# Supplementary material
Source: MDPI journal article supplement (https://www.mdpi.com/2071-1050/15/24/16591)
Supplement: s1 [file s1]

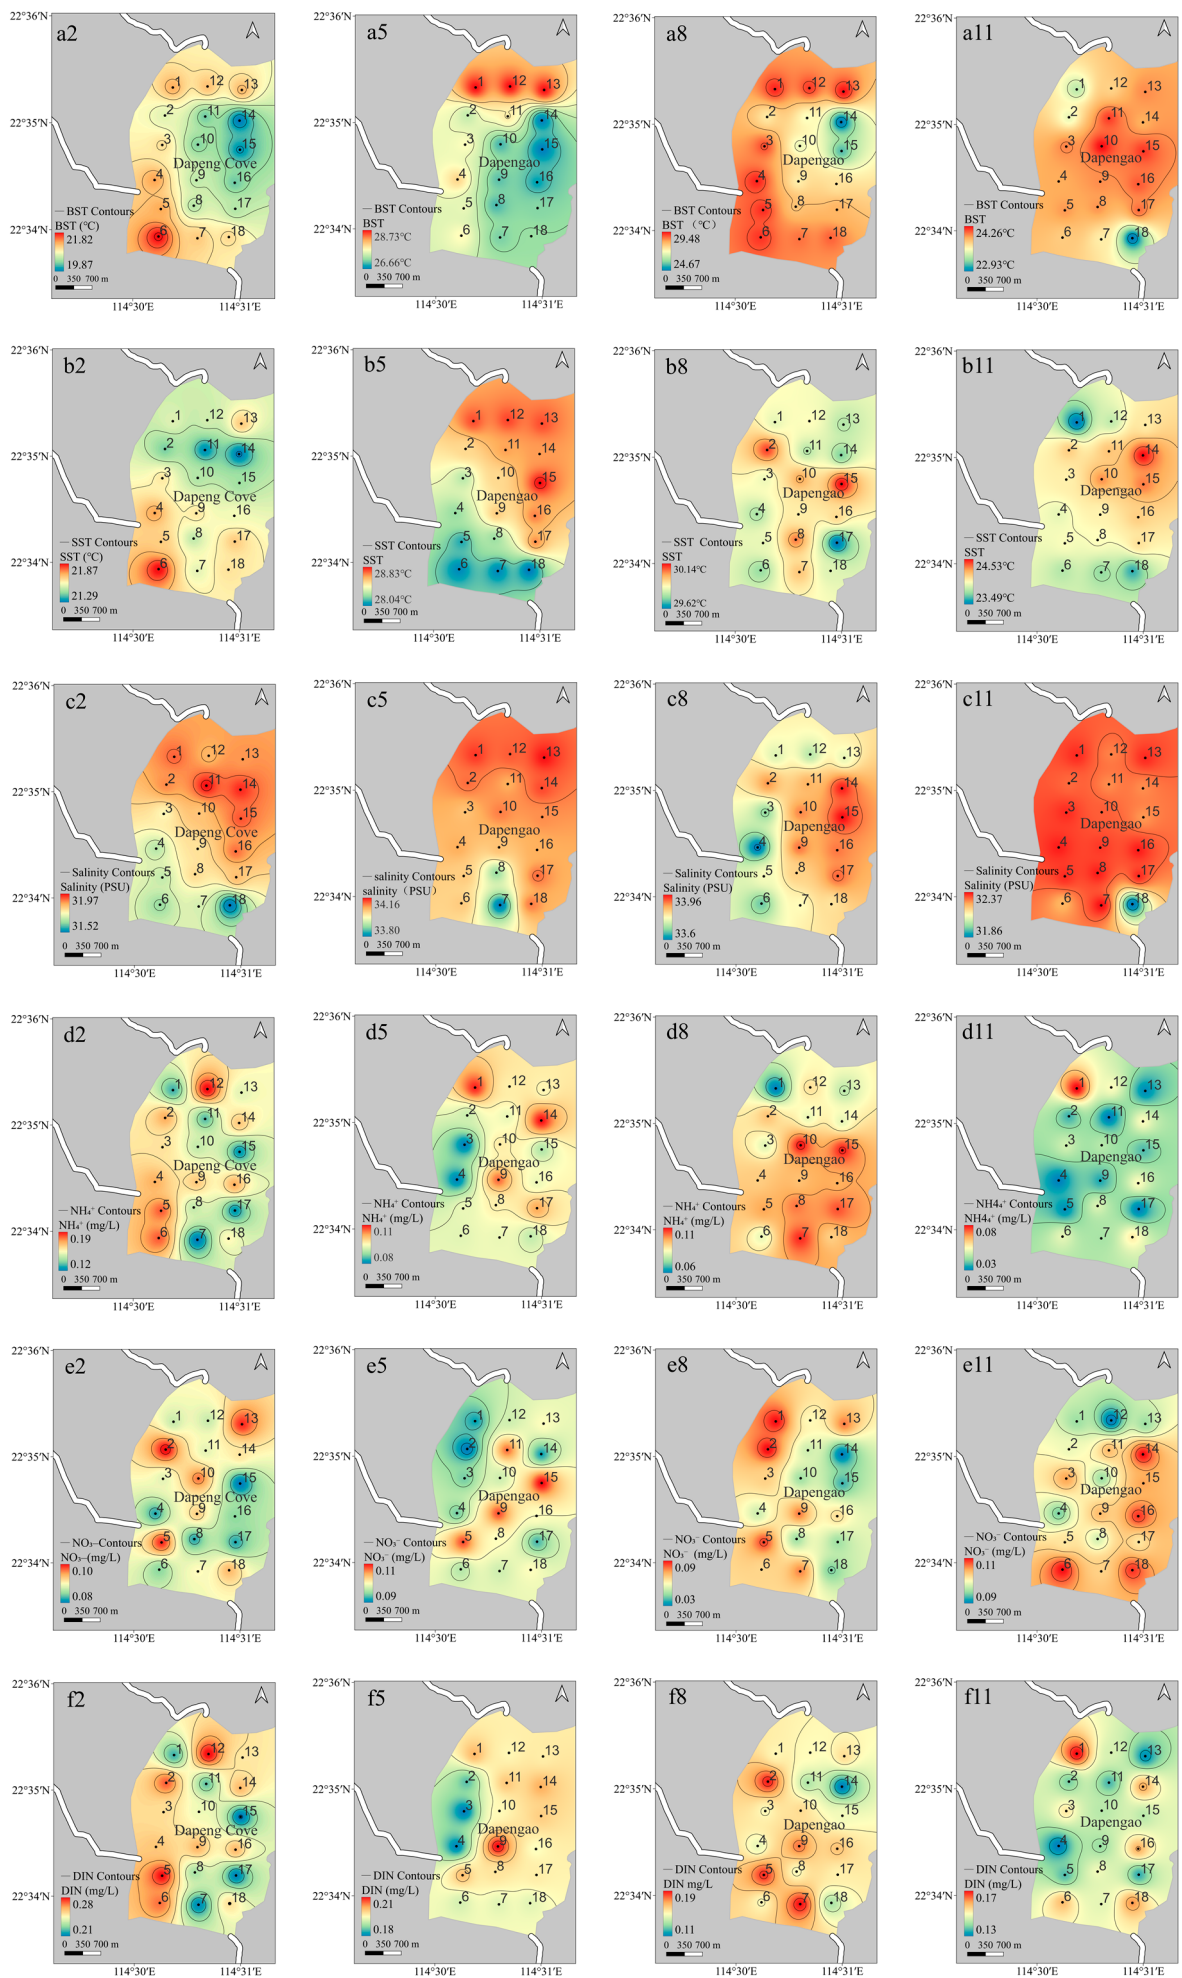

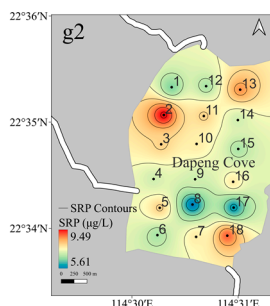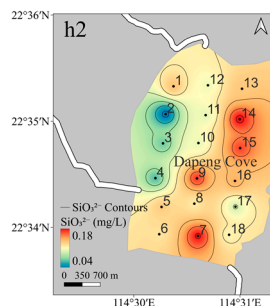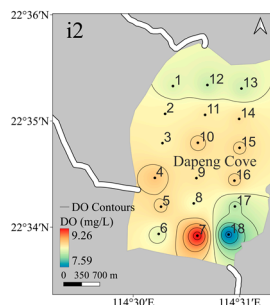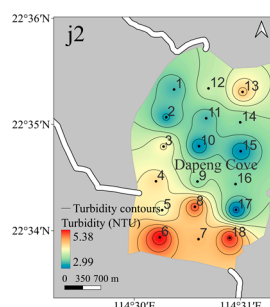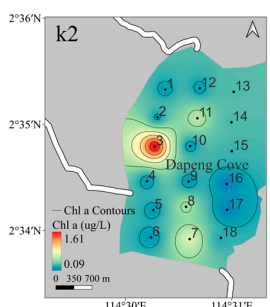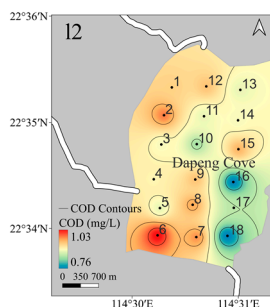



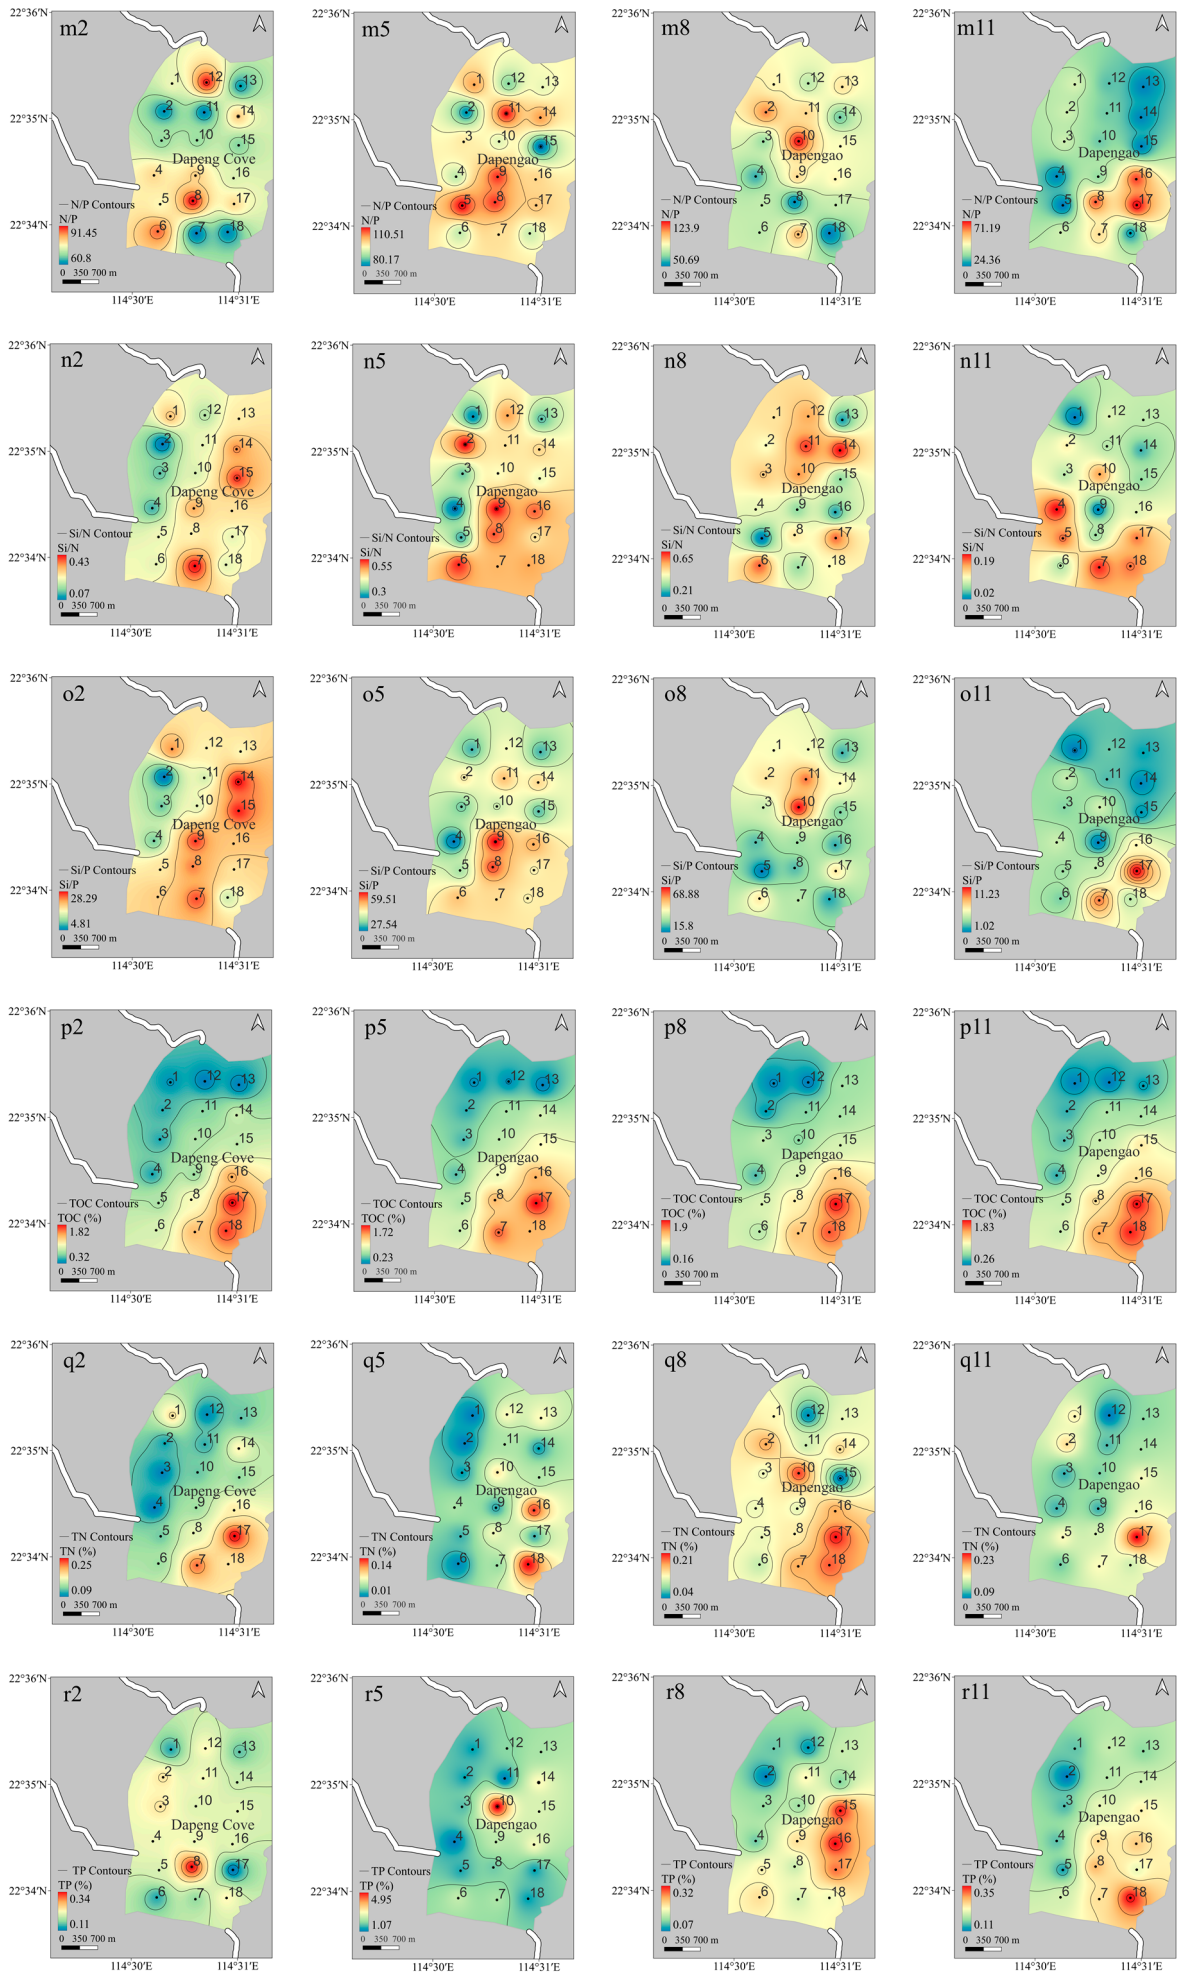

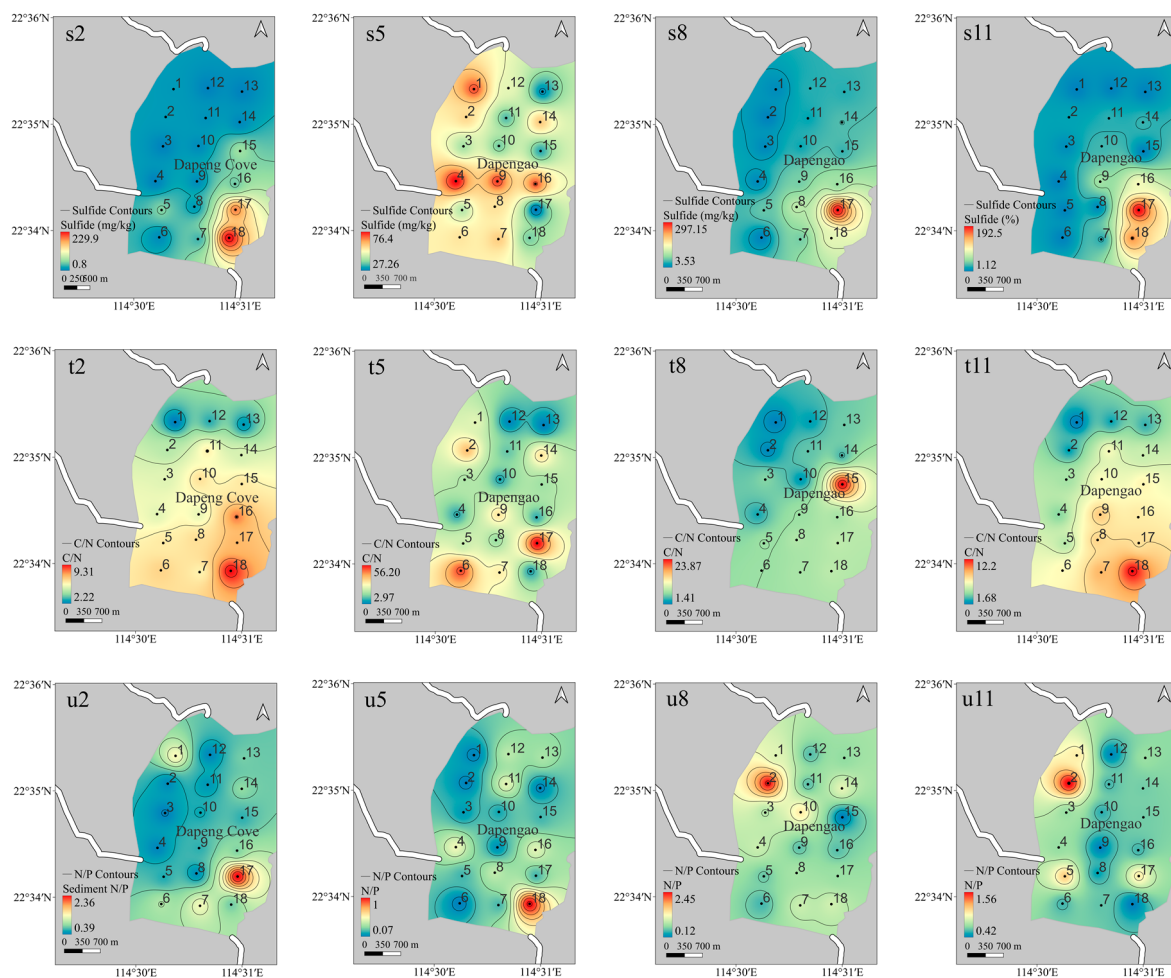

**Figure S1.** Spatial distribution of water and sediment environmental factors in different seasons.



**Table S1.** Environmental variables between seasons.

|                                       | Season (Mean±SD)      |                       |                       |                       | <i>F</i> | <i>p</i> |
|---------------------------------------|-----------------------|-----------------------|-----------------------|-----------------------|----------|----------|
|                                       | Autumn( <i>n</i> =18) | Spring( <i>n</i> =18) | Summer( <i>n</i> =18) | Winter( <i>n</i> =18) |          |          |
| BST(°C)                               | 23.87±0.33            | 27.50±0.69            | 28.06±1.42            | 20.81±0.55            | 285.275  | 0.000**  |
| SST(°C)                               | 24.03±0.26            | 28.47±0.28            | 29.88±0.14            | 21.56±0.14            | 5774.990 | 0.000**  |
| Salinity(PSU)                         | 32.29±0.12            | 34.06±0.09            | 33.81±0.10            | 31.80±0.12            | 1865.109 | 0.000**  |
| NH <sub>4</sub> <sup>+</sup> (mg/L)   | 0.04±0.01             | 0.10±0.01             | 0.09±0.01             | 0.15±0.02             | 177.774  | 0.000**  |
| SiO <sub>3</sub> <sup>2-</sup> (mg/L) | 0.03±0.01             | 0.17±0.04             | 0.13±0.03             | 0.12±0.04             | 62.348   | 0.000**  |
| SRP(μg/L)                             | 9.09±2.92             | 4.48±0.40             | 4.27±0.90             | 7.47±1.04             | 37.696   | 0.000**  |
| NO <sub>3</sub> <sup>-</sup> (mg/L)   | 0.10±0.00             | 0.10±0.01             | 0.06±0.02             | 0.09±0.00             | 63.783   | 0.000**  |
| NO <sub>2</sub> <sup>-</sup> (mg/L)   | 0.00±0.00             | 0.00±0.00             | 0.00±0.00             | 0.00±0.00             | 54.112   | 0.000**  |
| DIN(mg/L)                             | 0.15±0.01             | 0.20±0.01             | 0.15±0.02             | 0.25±0.02             | 130.686  | 0.000**  |
| N/P                                   | 39.75±15.49           | 97.28±9.40            | 82.83±19.34           | 73.89±10.14           | 53.395   | 0.000**  |
| Si/N                                  | 0.10±0.05             | 0.44±0.08             | 0.44±0.14             | 0.25±0.09             | 52.196   | 0.000**  |
| Si/P                                  | 4.10±2.80             | 43.03±9.06            | 36.27±14.11           | 18.62±6.74            | 66.612   | 0.000**  |
| COD(mg/L)                             | 1.61±0.27             | 0.75±0.23             | 0.60±0.21             | 0.90±0.07             | 80.953   | 0.000**  |
| Cd(mg/kg)                             | 0.04±0.03             | 0.03±0.01             | 0.03±0.02             | 0.05±0.05             | 2.348    | 0.080    |
| Sulfide(mg/kg)                        | 35.42±56.14           | 50.84±16.06           | 59.80±69.00           | 39.37±65.93           | 0.708    | 0.550    |
| Pb(mg/kg)                             | 33.67±19.96           | 26.25±13.09           | 30.00±19.33           | 38.45±21.61           | 1.385    | 0.255    |
| Cu(mg/kg)                             | 22.06±18.37           | 17.81±15.29           | 24.79±19.62           | 21.28±17.81           | 0.468    | 0.706    |
| Zn(mg/kg)                             | 64.29±35.71           | 53.16±26.30           | 58.26±29.87           | 68.26±49.33           | 0.601    | 0.617    |
| TOC(%)                                | 0.88±0.48             | 0.83±0.45             | 0.84±0.49             | 0.86±0.46             | 0.046    | 0.987    |
| TN(%)                                 | 0.14±0.03             | 0.05±0.04             | 0.13±0.05             | 0.15±0.04             | 19.345   | 0.000**  |
| Cr(mg/kg)                             | 62.99±25.04           | 39.61±21.86           | 59.12±23.25           | 46.95±21.61           | 3.982    | 0.011*   |

|                | Season (Mean±SD)      |                       |                       |                       | <i>F</i> | <i>p</i> |
|----------------|-----------------------|-----------------------|-----------------------|-----------------------|----------|----------|
|                | Autumn( <i>n</i> =18) | Spring( <i>n</i> =18) | Summer( <i>n</i> =18) | Winter( <i>n</i> =18) |          |          |
| Chl-a(mg/L)    | 1.35±0.55             | 0.57±0.44             | 1.00±0.42             | 0.37±0.36             | 17.529   | 0.000**  |
| TP(mg/g)       | 2.11±0.62             | 2.11±0.95             | 1.79±0.72             | 2.05±0.54             | 0.797    | 0.500    |
| TRIX           | 4.59±0.31             | 4.24±0.29             | 4.47±0.28             | 4.51±0.30             | 4.541    | 0.006**  |
| TP(%)          | 0.21±0.06             | 0.21±0.10             | 0.18±0.07             | 0.20±0.05             | 0.797    | 0.500    |
| N/P            | 0.72±0.31             | 0.28±0.24             | 0.86±0.51             | 0.81±0.49             | 7.590    | 0.000**  |
| DO(mg/L)       | 7.53±0.28             | 7.24±0.34             | 7.06±0.57             | 8.46±0.33             | 45.231   | 0.000**  |
| Turbidity(NTU) | 7.43±2.03             | 4.13±1.18             | 4.08±0.77             | 3.97±0.80             | 30.450   | 0.000**  |
| C/N            | 6.20±2.75             | 22.66±15.90           | 6.97±4.94             | 5.69±1.81             | 16.821   | 0.000**  |

\*  $p<0.05$  \*\*  $p<0.01$

**Table S2.** Absolute abundance statistics of main cyanobacteria between seasons based on Sequencing

| Genus                       | Summer  | Winter | Spring  | Autumn  |
|-----------------------------|---------|--------|---------|---------|
| <i>Synechococcus</i> CC9902 | 5261.00 | 15.72  | 5665.61 | 6882.55 |
| <i>Cyanobium</i> PCC-6307   | 919.50  | 7.72   | 1804.77 | 1069.00 |
